# Supplementary material for: Receptor activator for nuclear factor-κB ligand signaling promotes progesterone-mediated estrogen-induced mammary carcinogenesis
Source: PubMed Central journal article supplement — Cancer Sci. 2015 Jan 23;106(1):25–33. doi: 10.1111/cas.12571 (PMC4317778; doi:10.1111/cas.12571), 2015-01-23
Supplement: cas0106-0025-sd1.pdf [file cas0106-0025-sd1.pdf]

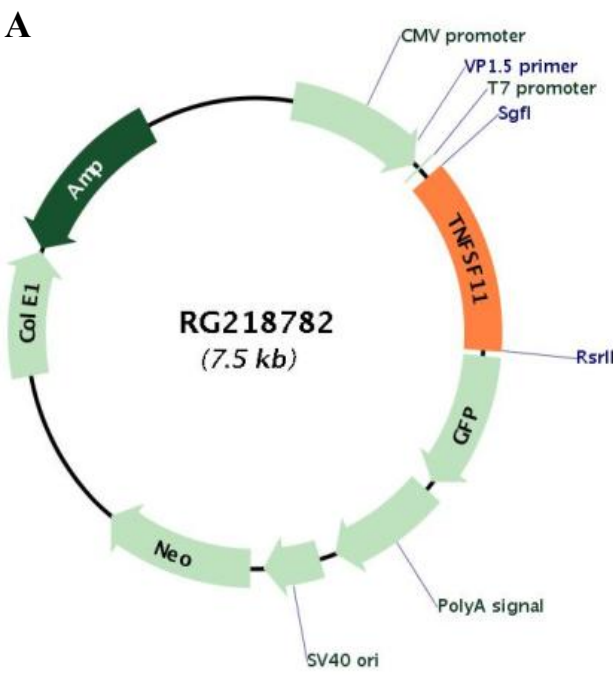

>RG218782 representing NM\_003701  
 Red=Cloning site Blue=ORF Green=Tags(s)

```
GACGTTGTATACGACTCCTATAGGGCGGCCGGGAATTCGTCTGACTGGATCCGGTACCGAGGAGATCTGCC
GCCGCGATCGCC
ATGCGCCGCGCCAGCAGAGACTACACCAAGTACCTGCGTGGCTCGGAGGAGATGGGCGGCGGCCCGGAG
CCCCGCACGAGGGGCCCTGCACGCCCCGCCGCGCCTGCGCCGCACCAGCCCCCGCCGCCTCCCCTC
CATGTTTCGTGGCCCTCCTGGGGCTGGGGCTGGGCCAGGTTGTCTGCAGCGTCGCCCTGTTCTTCTATTTC
AGAGCGCAGATGGATCCTAATAGAATATCAGAAGATGGCACTCACTGCATTTATAGAATTTTGAGACTCC
ATGAAAATGCAGATTTTCAAGACACAACCTCTGGAGAGTCAAGATACAAAATTAATACCTGATTCATGTAG
GAGAATTAACAGGCCTTTCAAGGAGCTGTGCAAAAGGAATTACAACATATCGTTGGATCACAGCACATC
AGAGCAGAGAAAGCGATGGTGGATGGCTCATGGTTAGATCTGGCCAAGAGGAGCAAGCTTGAAGCTCAGC
CTTTTGCTCATCTCACTATTAATGCCACCGACATCCCATCTGGTTCCCATAAAGTGAGTCTGTCCTCTTG
GTACCATGATCGGGGTTGGGCCAAGATCTCCAACATGACTTTTAGCAATGGAAACTAATAGTTAATCAG
GATGGCTTTTATTACCTGTATGCCAACATTTGCTTTCGACATCATGAACTTCAGGAGACCTAGCTACAG
AGTATCTTCAACTAATGGTGTACGTCCTAAACCAGCATCAAAATCCCAAGTTCTCATACCCTGATGAA
AGGAGGAAGCACCAAGTATTGGTCAGGGAATTCTGAATTCCATTTTTATTCCATAAACGTTGGTGGATT
TTAAGTTACGGTCTGGAGAGGAAATCAGCATCGAGGTCTCCAACCCCTCCTTACTGGATCCGGATCAGG
ATGCAACATACTTTGGGGCTTTTAAAGTTCGAGATATAGAT
```

AGCGGACCGACGCGTACGCGGCCGCTCGAGG - GFP Tag - GTTTAA

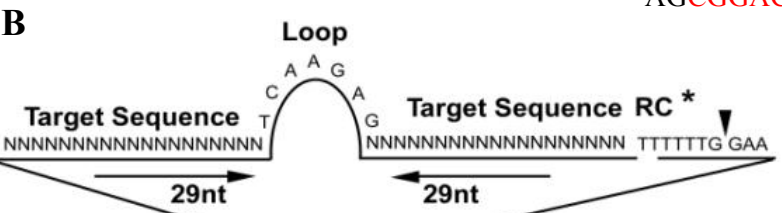

RefSeq: NM\_003701NM\_033012

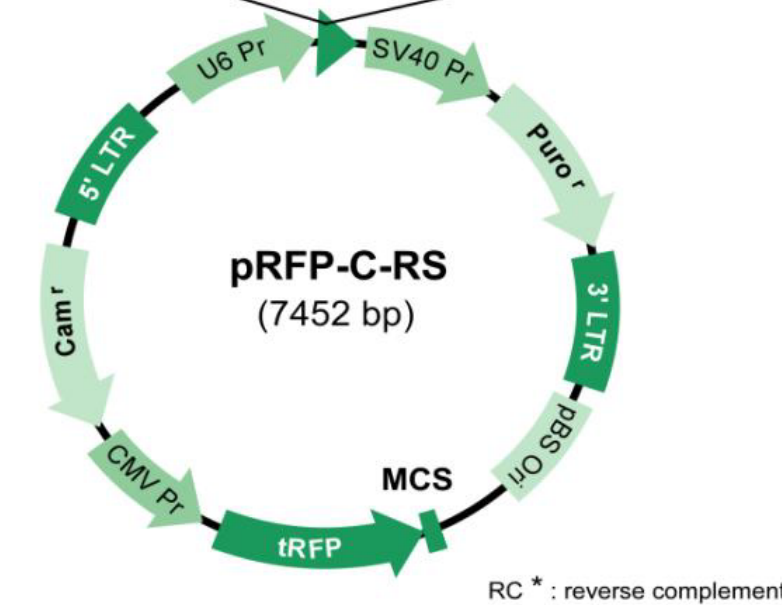

```
Sh1-FI334901 AGACACAACCTCTGGAGAGTCAAGATACAA
Sh2-FI334902 CCATAAAGTGAGTCTGTCCTCTTGGTACC
Sh3-FI334903 GAAAGGAGGAAGCACCAAGTATTGGTCAG
Sh4-FI334904 AGTTACGGTCTGGAGAGGAAATCAGCATC
```

Fig. S1: Vector map and insert sequences.  
 Sequence of plasmid DNA expressing TNFSF11 transcript variant 1 (RANKL) cloned into a pCMV6-AC-GFP vector (a). Sequence of 4 different shRNAs cloned into pRFP-C-RS vector (b).

RC \* : reverse complement
